# Supplementary material for: The Different Roles of miRNA-92a-2-5p and let-7b-5p in Mitochondrial Translation in db/db Mice
Source: PubMed Central journal article supplement — Mol Ther Nucleic Acids. 2019 Jun 28;17:424–35. doi: 10.1016/j.omtn.2019.06.013 (PMC6637210; doi:10.1016/j.omtn.2019.06.013), 2019-06-28
Supplement: mmc1.pdf [file mmc1.pdf]

**OMTN, Volume 17**

## **Supplemental Information**

**The Different Roles of miRNA-92a-2-5p**

**and let-7b-5p in Mitochondrial**

**Translation in db/db Mice**

**Huaping Li, Beibei Dai, Jiahui Fan, Chen Chen, Xiang Nie, Zhongwei Yin, Yanru Zhao, Xudong Zhang, and Dao Wen Wang**

# Supplemental Figure 1.

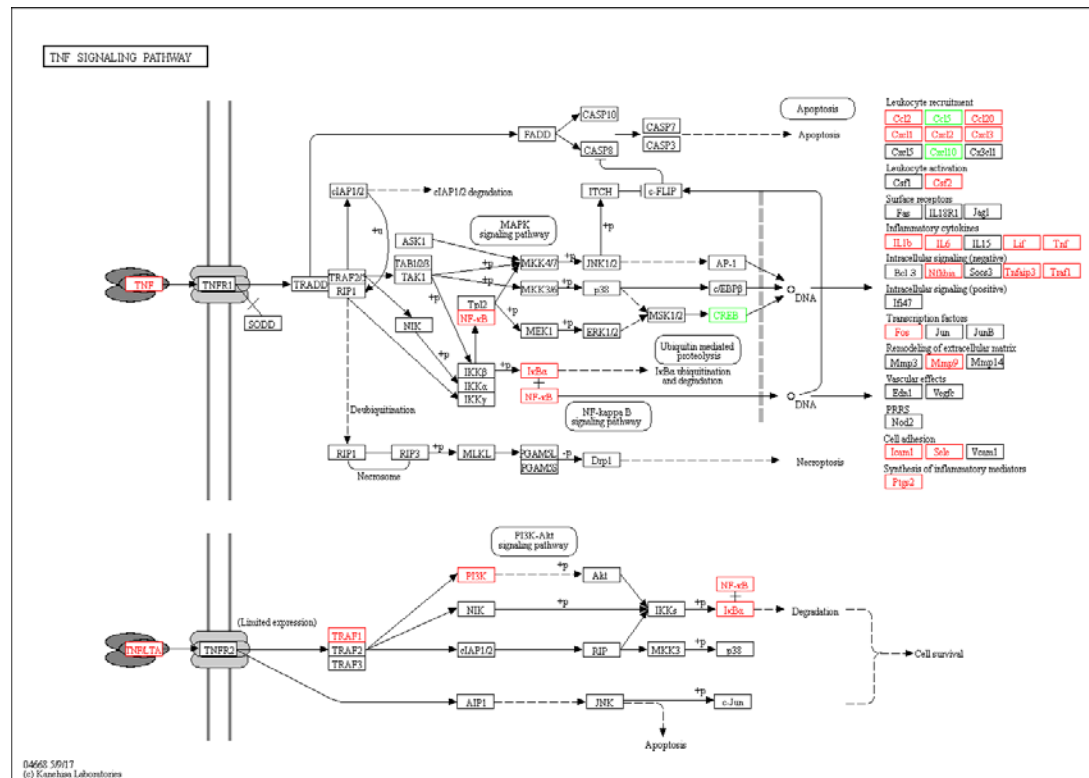

**TNF pathway effected by si-Cy5b:** TNF pathway-related genes in si-Cy5b treated human cardiomyocytes. Red, upregulated genes; Green, downregulated genes.

## Supplemental Figure 2.

**A**

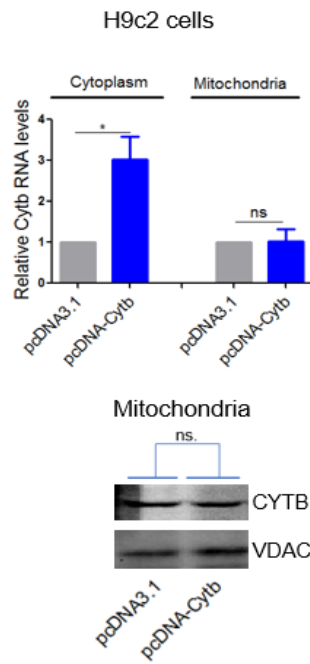

**B**

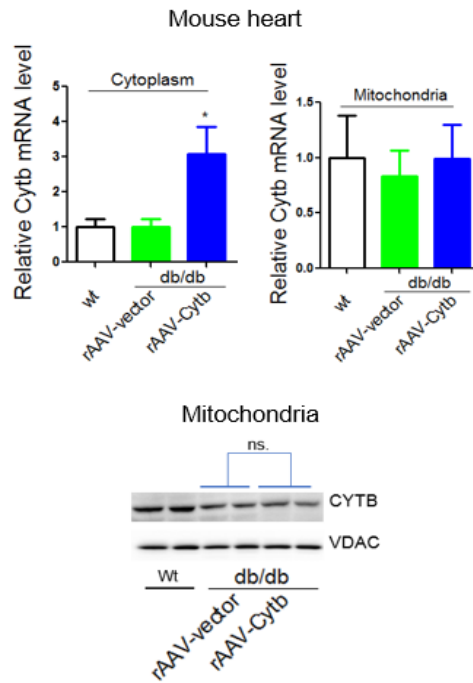

**C**

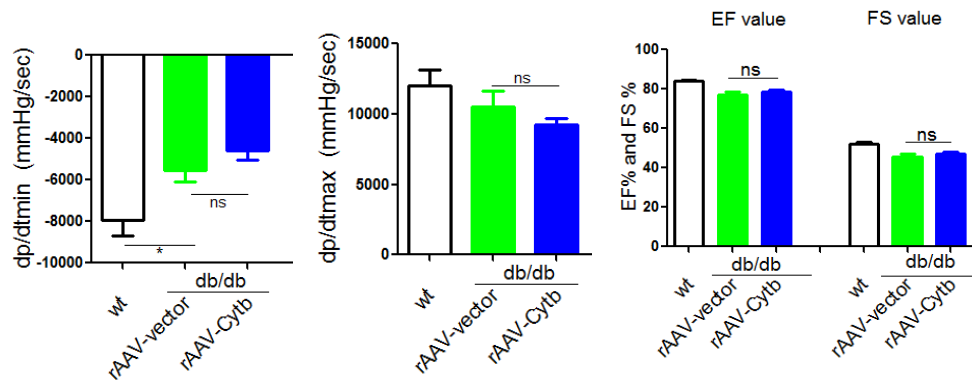

**D**

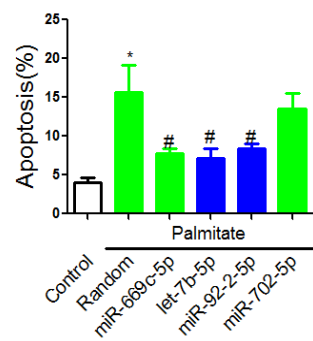

**E**

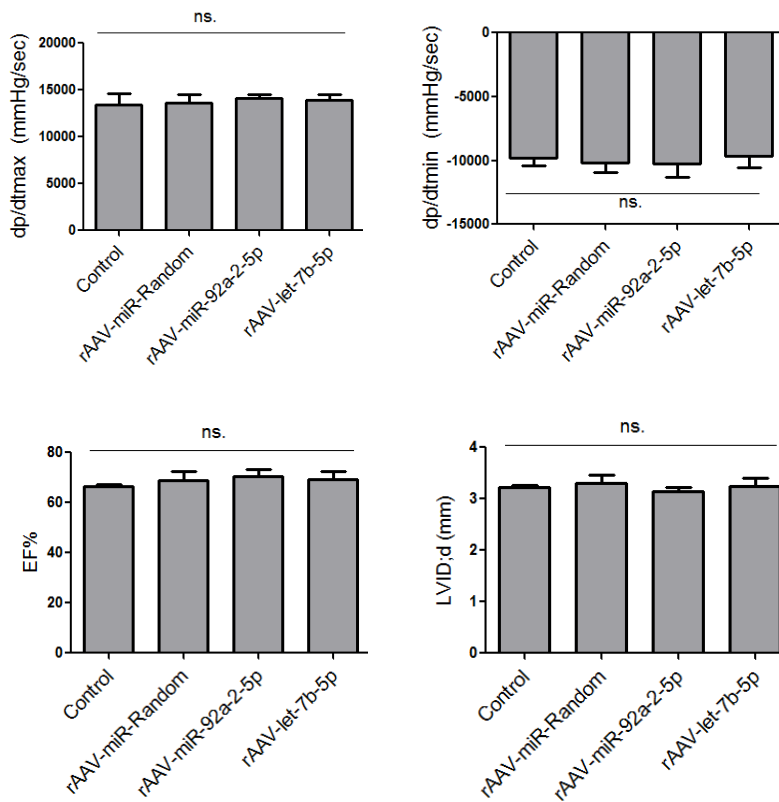

**F**

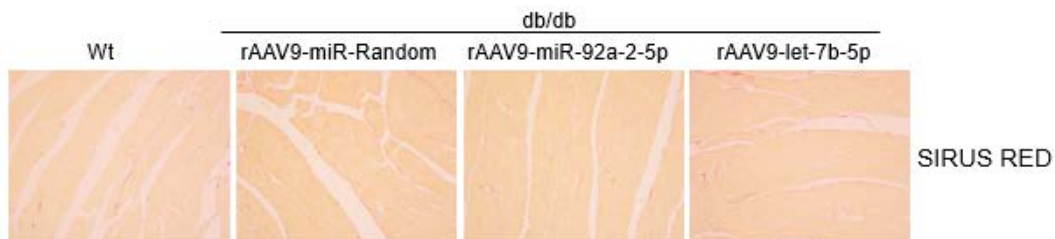

**Cytb overexpression was not able to translocate into mitochondria and influence cardiac function:** (A-B) Exogenous Cytb were not able to translocate into mitochondria in vitro and in vivo.  $n=3$ ,  $*p<0.05$  vs. control, (C) Exogenous Cytb overexpression had no effects on cardiac function.  $n=5$ , (D) MiR-92a-2-5p and let-7b-5p decreased apoptosis in palmitate treated H9c2 cells.  $n=3$ ,  $*p<0.05$  vs control,  $\#p<0.05$  vs. Random-Palmitate, (E) MiR-92a-2-5p and let-7b-5p had no effect on cardiac function in normal wt mice.  $n=5$ , (F) Representative images of fibrosis in heart sections of db/db

mice compared to wild type controls. n=6

### Supplemental Figure 3.

A

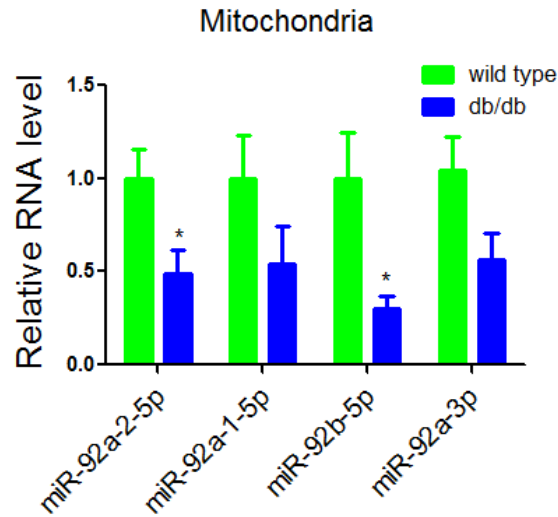

B

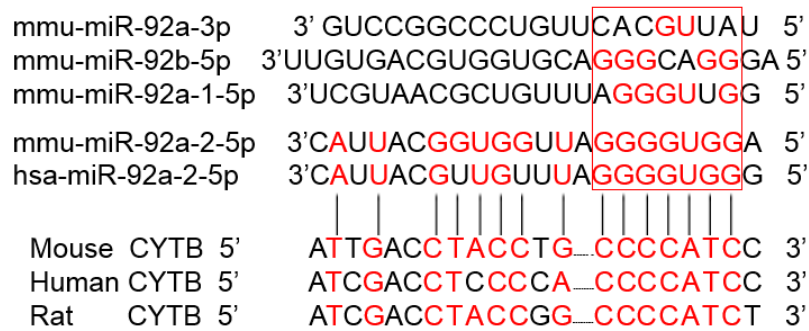

**miR-92a family in db/db heart:** (A) Levels of miR-92 family in mitochondria of db/db mice heart. n=3, \*p<0.05 vs. wild type. (B) Alignment of miR-92 family with Cytb gene.

**Supplemental Table 1. Profile data of dysregulated miRNAs in total lysis of db/db mice heart.**

| miRNA name       | Fold change<br>(db/db vs control) | P value  |
|------------------|-----------------------------------|----------|
| mmu-miR-3100-3p  | 3.379849                          | 0.002298 |
| mmu-miR-483-3p   | 2.88984                           | 0.028147 |
| mmu-miR-484      | 2.66609                           | 0.003438 |
| mmu-miR-1306-5p  | 2.320597                          | 0.004208 |
| mmu-miR-5132-3p  | 2.209863                          | 0.013166 |
| mmu-miR-532-3p   | 2.189045                          | 0.010657 |
| mmu-miR-1188-3p  | 2.111686                          | 0.010958 |
| mmu-miR-877-3p   | 2.074965                          | 0.029558 |
| mmu-miR-3092-3p  | 2.074283                          | 0.043518 |
| mmu-miR-1894-5p  | 1.953177                          | 0.047441 |
| mmu-miR-1249-3p  | 1.762249                          | 0.0091   |
| mmu-miR-129-1-3p | 1.74805                           | 0.003375 |
| mmu-miR-291b-5p  | 1.692632                          | 0.033872 |
| mmu-miR-1952     | 1.636339                          | 0.017196 |
| mmu-miR-129-2-3p | 1.631197                          | 0.02885  |
| mmu-miR-3473c    | 1.595201                          | 0.02933  |
| mmu-miR-1247-5p  | 1.483798                          | 0.037113 |
| mmu-miR-1843b-3p | 1.469158                          | 0.009484 |
| mmu-miR-5627-3p  | 1.455016                          | 0.042572 |
| mmu-miR-671-3p   | 1.37186                           | 0.037427 |
| mmu-miR-1905     | 1.34211                           | 0.029669 |
| mmu-miR-675-3p   | 1.275374                          | 0.046373 |
| mmu-miR-133b-5p  | 1.223183                          | 0.024403 |
| mmu-let-7e-3p    | 1.221956                          | 0.026879 |
| mmu-miR-451b     | 0.812181                          | 0.008828 |
| mmu-miR-1198-5p  | 0.803181                          | 0.008451 |
| mmu-miR-5113     | 0.797455                          | 0.014974 |
| mmu-miR-1306-3p  | 0.797017                          | 0.011831 |
| mmu-miR-1930-3p  | 0.771288                          | 0.032633 |
| mmu-miR-294-3p   | 0.771169                          | 0.03553  |
| mmu-miR-667-5p   | 0.769545                          | 0.012857 |
| mmu-miR-466b-3p  | 0.734125                          | 0.048221 |
| mmu-miR-493-3p   | 0.731805                          | 0.037204 |
| mmu-let-7i-5p    | 0.715497                          | 0.022092 |
| mmu-let-7b-5p    | 0.691732                          | 0.049466 |
| mmu-let-7k       | 0.674384                          | 0.021577 |
| mmu-miR-672-5p   | 0.66891                           | 0.031271 |
| mmu-miR-6348     | 0.660047                          | 0.032634 |
| mmu-miR-466m-5p  | 0.644924                          | 0.016047 |
| mmu-miR-669m-5p  | 0.633469                          | 0.026725 |

|                 |          |          |
|-----------------|----------|----------|
| mmu-miR-6409    | 0.630726 | 0.012737 |
| mmu-miR-466h-5p | 0.629384 | 0.049238 |
| mmu-miR-468-3p  | 0.592079 | 0.049524 |
| mmu-miR-669n    | 0.584645 | 0.010694 |
| mmu-miR-669c-5p | 0.580205 | 0.019757 |
| mmu-miR-574-5p  | 0.574544 | 0.00439  |
| mmu-miR-466i-5p | 0.574101 | 0.007912 |
| mmu-miR-3082-5p | 0.543192 | 0.012309 |

**Supplemental Table 2. Profile data of dysregulated miRNAs in mitochondria of db/db mice heart.**

| miRNA name       | Fold change<br>(db/db vs control) | P value  |
|------------------|-----------------------------------|----------|
| mmu-miR-1896     | 0.369378                          | 0.017813 |
| mmu-miR-1934-3p  | 0.436145                          | 0.009862 |
| mmu-miR-6368     | 0.501715                          | 0.013362 |
| mmu-miR-365-1-5p | 0.539838                          | 0.039712 |
| mmu-miR-5110     | 0.62789                           | 0.005169 |
| mmu-miR-702-5p   | 0.650111                          | 0.033205 |
| mmu-miR-5622-3p  | 0.65223                           | 0.041605 |
| mmu-miR-5128     | 0.697197                          | 0.004049 |
| mmu-miR-320-3p   | 0.699476                          | 0.031386 |
| mmu-miR-92a-2-5p | 0.713042                          | 0.003418 |
| mmu-miR-6244     | 0.715978                          | 0.023872 |
| mmu-miR-92b-5p   | 0.719351                          | 0.029506 |
| mmu-miR-1931     | 0.742462                          | 0.046414 |
| mmu-miR-181d-5p  | 0.748628                          | 0.03631  |



**Supplemental Table 3. List of Antibodies.**

| Antibody                 | Company                   | Catalog number |
|--------------------------|---------------------------|----------------|
| OxPhos Cocktail (NDUFA8) | AbCam                     | ab110413       |
| OxPhos Cocktail (SDHB)   | AbCam                     | ab110413       |
| OxPhos Cocktail (UQCRC2) | AbCam                     | ab110413       |
| ND1                      | ABclonal                  | A5250          |
| CYTB                     | proteintech               | 55090-1-AP     |
| COI                      | BOSTER                    | BA4150         |
| ATP6                     | ABclonal                  | A8193          |
| IRS1                     | Cell Signaling Technology | #2382          |
| Akt1/2/3                 | Santa Cruz Biotechnology  | sc-8312        |
| IGF1                     | ABclonal                  | A0303          |

**Supplemental Table 4. siRNAs (smart silencer) sequences.**

| gene name    | Smart silencer sequences                                                                                                                   |
|--------------|--------------------------------------------------------------------------------------------------------------------------------------------|
| Si-r-ND1     | CACTCCTAATCCCAATCTT<br>CCACAACCTTTCCTATGAAT<br>GCCGAGTACACCAATATTA<br>CCTAACACTCCTAATCCCAA<br>TCCTAGCAGGAATTCCACCC<br>CGCAGGACCATTGCCCCTAT |
| Si-r-CYTB    | CACGTCTGATACCATAACA<br>CCAGTAGAACACCCATTTA<br>CCCATTCCATCCATATTAT<br>CTCCATGTGGGACGAGGACT<br>ACCATTCTGCATACTTCAA<br>ACCCTAACACGCTTCTTCGC   |
| Si-r-COI     | GCATTCCCACGAATAAATA<br>CAGGGATCGTACTATCTAA<br>GAAGAACCTTCCTATGTAA<br>TGGAGGTGGAGACCCAATCC<br>CTAACAGGGATCGTACTATC<br>TAGCAGGGATACCTCGTCGT  |
| Si-r-ATP6    | CCGACTACACTCATTTCOA<br>CCTATGTATTCACCCTTCT<br>CTCCCTAATTCCCATACTA<br>TCCCATCATCAGAACGCCTA<br>TCACCCTTCTAGTAAGCCTG<br>AACCTAAGCATAGCCATCCC  |
| Si-h-CYTB    | GCGCCTCAATATTCTTTAT<br>CCGTGAGGCCAAATATCAT<br>GCAGACCTCCTCATTCTAA<br>CCCTATTACTATCCATCCTC<br>CTTCACAACAATCCTAATCC<br>AAAATCACCTTCCACCCTTA  |
| Si-r/m-GW182 | CCCACTGATTACATTCCAT<br>GGACCAAATAACACTACTA<br>GGAACAAACTGCCTAGCAA<br>GATCAGCACACATTACTCCA<br>GAGACCCTCCAAAGTGTAAT<br>CAAATCGCCTAACGGCTCTA  |
| Si-r-IRS1    | GAGAAGAAGTGGCGGCACA                                                                                                                        |

r, rat; h, human; m, mouse

**Supplemental Table 5. Primers of qRT-PCR.**

| Gene name       | Forward (5'-3')           | Reverse (5'-3')         |
|-----------------|---------------------------|-------------------------|
| m-ND1-134bp     | TCCGAGCATCTTATCCACGC      | GTATGGTGGTACTCCCGCTG    |
| m-ND2-299bp     | TCCTCCTGGCCATCGTACTC      | TCCTCCTCATGCCCTATGAA    |
| m-ND3-81bp      | TGCATTCTGACTCCCCCAAAT     | GCAGAGCTTGTAGGGTTCGAA   |
| m-ND4-201bp     | AGCTCAATCTGCTTACGCCA      | GCTGTGGATCCGTTTCGTAGT   |
| m-ND4L-166bp    | AACCTCACCATAGCCTTCTCA     | TGATGGGGATTGGTATGGAGC   |
| m-ND5-85bp      | ACCCAATCAAACGCCTAGCA      | AGGACTGGAATGCTGGTTGG    |
| m-ND6-79bp      | GAAGGAGGGATTGGGGTAGC      | CCGCAAACAAGATCACCCAG    |
| m-CYTB-160bp    | ACGCAAACGGAGCCTCAATA      | CCTCATGGAAGGACGTAGCC    |
| m-CO1-74bp      | GCTAGCCGCAGGCATTACTA      | CTCCTCCAGCGGGATCAAAG    |
| m-CO2-96bp      | CCTCCACTCATGAGCAGTCC      | AACCCTGGTCGGTTTGATGTT   |
| m-CO3-97bp      | GGCCACCACACTCCTATTGT      | ACGCTCAGAAGAATCCTGCAA   |
| m-ATP6-108bp    | GCATTAGCAGTCCGGCTTAC      | GGTAGCTGTTGGTGGGCTAAT   |
| m-ATP8-110bp    | TGCCACAACACTAGATACATCAACA | AGGTGCCAGTGGGAATGTTT    |
| m12S rRNA-132bp | CCGCTCTACCTCACCATCTC      | CCCATTTTCATTGGCTACACC   |
| r-IRS1-167bp    | GAAAGCACTGTGACACCGGA      | TGGAACACGGTTTCAGAGCA    |
| r-AKT1-125bp    | AGTGTGTGGACAGTGAACGG      | GGCTTCTGGACTCGGCAAT     |
| r-IGF1-83bp     | GCCTCCCGAGGAACAGAAAA      | TGGCAGGTGTTCCGATGTTT    |
| m-GAPDH-123bp   | AGGTCGGTGTGAACGGATTTG     | TGTAGACCATGTAGTTGAGGTCA |
| r-GAPDH-252bp   | ACAGCAACAGGGTGGTGGAC      | TTTGAGGGTGCAGCGAACTT    |

m, mouse; r, rat
